# Supplementary material for: Pressure induced transformations of 1,4-diazabicyclo[2.2.2]octane (dabco) hydroiodide: diprotonation of dabco, its N-methylation and co-crystallization with methanol
Source: Royal Society of Chemistry journal article supplement (doi:10.1039/c001379j), 2010-01-01
Supplement: c001379j.pdf [file c001379j.pdf]

## Supplementary Information

**Table S1** Crystal data and structure refinements details for high-pressure measurements of dabcoHI with methanol.

| Formula                                                    | Dabco2HI:3CH <sub>3</sub> OH<br>[C <sub>6</sub> H <sub>14</sub> N <sub>2</sub> ] <sup>+</sup> 2I <sup>-</sup> :3CH <sub>3</sub> OH] | DabcoCH <sub>3</sub> I:2CH <sub>3</sub> OH<br>[C <sub>7</sub> H <sub>15</sub> N <sub>2</sub> ] <sup>+</sup> I <sup>-</sup> :CH <sub>3</sub> OH] |
|------------------------------------------------------------|-------------------------------------------------------------------------------------------------------------------------------------|-------------------------------------------------------------------------------------------------------------------------------------------------|
| Pressure (GPa)                                             | 1.80(5) GPa                                                                                                                         | 2.40(5) GPa                                                                                                                                     |
| Temperature (K)                                            | 296(2)                                                                                                                              | 296(2)                                                                                                                                          |
| Formula weight<br>(g/mol)                                  | 464.12                                                                                                                              | 318.19                                                                                                                                          |
| Wavelength (Å)                                             | 0.71073                                                                                                                             | 0.71073                                                                                                                                         |
| Crystal system                                             | Monoclinic                                                                                                                          | Monoclinic                                                                                                                                      |
| Space group                                                | <i>P</i> 2 <sub>1</sub> / <i>m</i>                                                                                                  | <i>P</i> 2 <sub>1</sub> / <i>m</i>                                                                                                              |
| Unit cell dimensions<br>(Å, °)                             | a 7.385(3)<br>b 7.782(5)<br>c 12.82(8)<br>β 95.02(12)                                                                               | 8.88(2)<br>6.5844(4)<br>10.335(10)<br>108.69(19)                                                                                                |
| Volume (Å <sup>3</sup> )                                   | 734(5)                                                                                                                              | 572.6(15)                                                                                                                                       |
| Z                                                          | 2                                                                                                                                   | 2                                                                                                                                               |
| Calculated density<br>(g/cm <sup>3</sup> )                 | 2.101                                                                                                                               | 1.845                                                                                                                                           |
| Absorption coefficient<br>(mm <sup>-1</sup> )              | 4.284                                                                                                                               | 2.777                                                                                                                                           |
| F(000)                                                     | 448                                                                                                                                 | 320                                                                                                                                             |
| Crystal size (mm)                                          | 0.26/0.10/0.10                                                                                                                      | 0.42/0.27/0.09                                                                                                                                  |
| θ-range for data<br>collection (°)                         | 2.77 to 28.92                                                                                                                       | 2.64 to 29.20                                                                                                                                   |
| Min/max indices: h, k,<br>l                                | -10/10, -7/7, -4/4                                                                                                                  | -7/6, -9/9, -13/13                                                                                                                              |
| Reflect. Collected/<br>unique (R <sub>int</sub> )          | 639/281 (0.0847)                                                                                                                    | 3760/328 (0.0683)                                                                                                                               |
| Refinement method                                          | Full-matrix least-squares on <i>F</i> <sup>2</sup>                                                                                  |                                                                                                                                                 |
| Completeness (%)                                           | 13.5                                                                                                                                | 19.6                                                                                                                                            |
| Data/restraints/paramet<br>ers                             | 281/7/47                                                                                                                            | 328/5/42                                                                                                                                        |
| Goodness-of-fit on <i>F</i> <sup>2</sup>                   | 1.386                                                                                                                               | 1.086                                                                                                                                           |
| Final R <sub>1</sub> /wR <sub>2</sub> (I>2σ <sub>1</sub> ) | 0.0617/0.1424                                                                                                                       | 0.0396/0.0841                                                                                                                                   |
| R <sub>1</sub> /wR <sub>2</sub> (all data)                 | 0.1172/0.1682                                                                                                                       | 0.0413/0.0903                                                                                                                                   |
| Weighting scheme <sup>a)</sup>                             | 1/[sigma <sup>2</sup> (Fo <sup>2</sup> )+(0.0316*P) <sup>2</sup> +2<br>3.92*P]                                                      | 1/[sigma <sup>2</sup> (Fo <sup>2</sup> )+(<br>0.0436*P) <sup>2</sup> +2.81*P]                                                                   |
| Largest diff. peak and<br>hole (e.Å <sup>-3</sup> )        | 0.625/-0.672                                                                                                                        | 0.296/-0.301                                                                                                                                    |

<sup>a)</sup>  $w=1/(\sigma^2 F_o^2+w_l^2*P^2+w_2*P)$ , where  $P=(\text{Max}(F_o^2,0)+2*F_c^2)/3$

**Table S2** Shortest intermolecular distances ( $\text{\AA}$ ,  $^\circ$ ) in dabco2HI:3CH<sub>3</sub>OH at 1.80 GPa/296 K.

| <b>DH...A</b>               | <b>H...A</b> | <b>D...A</b> | <b>D-H...A</b> | <b>Symmetry codes</b> |
|-----------------------------|--------------|--------------|----------------|-----------------------|
| O(11)H...O(12) <sup>i</sup> | 2.02         | 2.79(7)      | 157.66         | x,y,z                 |
| N(1)H...O(11) <sup>i</sup>  | 2.23         | 2.93(4)      | 132.91         | x,y,z; x,0.5-y,z      |
| N(2)H...O(11) <sup>i</sup>  | 2.39         | 3.06(5)      | 130.44         | x-1,0.5-y,z; x-1,y,z  |
| C(3)H...O(11) <sup>i</sup>  | 2.70         | 3.12(5)      | 106.11         | x,y,z                 |
| O(12)H...I(1) <sup>i</sup>  | 2.70         | 3.51(8)      | 167.76         | 1-x,y-0.5,2-z         |
| C(3)H...I(2) <sup>i</sup>   | 3.01         | 3.80(7)      | 139.64         | x,y,z                 |
| C(11)H...I(2) <sup>i</sup>  | 3.02         | 3.95(6)      | 164.54         | 1-x,0.5+y,1-z         |
| N(2)H...I(1) <sup>i</sup>   | 3.14         | 3.69(8)      | 121.21         | x-1,y,z               |
| C(3)H...I(1) <sup>i</sup>   | 3.15         | 3.92(7)      | 137.43         | x,y,z                 |
| C(3)H...I(1) <sup>i</sup>   | 3.16         | 3.70(6)      | 116.54         | 1-x,y-0.5,2-z         |
| C(4)H...I(2) <sup>i</sup>   | 3.16         | 3.86(7)      | 130.35         | x,y,z                 |
| C(2)H...I(2) <sup>i</sup>   | 3.18         | 3.59(11)     | 107.29         | -x,0.5+y,1-z          |
| C(4)H...I(1) <sup>i</sup>   | 3.17         | 3.79(6)      | 123.22         | x-1,y,z               |

**Table S3** Shortest intermolecular distances ( $\text{\AA}$ ,  $^\circ$ ) in dabcoCH<sub>3</sub>I:2CH<sub>3</sub>OH at 2.40 GPa.

| <b>DH...A</b>              | <b>H...A</b> | <b>D...A</b> | <b>D-H...A</b> | <b>Symmetry code</b> |
|----------------------------|--------------|--------------|----------------|----------------------|
| O(12)H...N(1) <sup>i</sup> | 1.92         | 2.74(4)      | 179.94         | x,y,z                |
| C(3)H...O(12) <sup>i</sup> | 2.34         | 3.16(1)      | 140.70         | 1-x,y-0.5,-z         |
| C(4)H...O(11) <sup>i</sup> | 2.50         | 2.91(2)      | 105.40         | 1-x,y-0.5,-z         |
| C(1)H...O(12) <sup>i</sup> | 2.56         | 3.31(1)      | 133.96         | 1-x,y-0.5,-z         |
| C(3)H...O(11) <sup>i</sup> | 2.61         | 2.98(1)      | 103.33         | 1-x,y-0.5,-z         |
| O(11)H...I(1) <sup>i</sup> | 2.70         | 3.48(4)      | 159.46         | x,y,z                |
| C(5)H...I(1) <sup>i</sup>  | 3.03         | 3.97(2)      | 167.85         | x,y,z-1              |
| C(11)H...I(1) <sup>i</sup> | 3.06         | 4.02(3)      | 176.17         | 1-x,0.5+y,1-z        |
| C(5)H...I(1) <sup>i</sup>  | 3.10         | 4.02(2)      | 163.22         | -x,0.5+y,-z          |
